# Supplementary material for: Peroxymonosulfate Activation by Palladium(II) for Pollutants Degradation: A Study on Reaction Mechanism and Molecular Structural Characteristics
Source: MDPI journal article supplement (doi:10.3390/ijerph192013036), 2022-10-11
Supplement: s1 [file s1]

## Supplementary Materials

### **Peroxymonosulfate activation by palladium(II) for pollutants degradation: a study on reaction mechanism and molecular structural characteristics**

Bowen Yang <sup>1,2</sup>, Qiang Ma <sup>1,2</sup>, Jiming Hao <sup>3</sup> and Xiaojie Sun <sup>4,\*</sup>

<sup>1</sup> *Sichuan Provincial Engineering Research Center of City Solid Waste Energy and Buliding Materials Conversion & Utilization Technology, Chengdu University, Chengdu 610106, China.*

<sup>2</sup> *School of Architecture and Civil Engineering, Chengdu University, Chengdu 610106, China.*

<sup>3</sup> *State Key Joint Laboratory of Environment Simulation and Pollution Control, School of Environment, Tsinghua University, Beijing 100084, China.*

<sup>4</sup> *Guangxi Key Laboratory of Environmental Pollution Control Theory and Technology, Guilin University of Technology, Guilin 541004, China.*

*\* Corresponding author: Xiaojie Sun*

*Tel./fax: 15078329789*

*E-mail: sunxiaojie@glut.edu.cn*

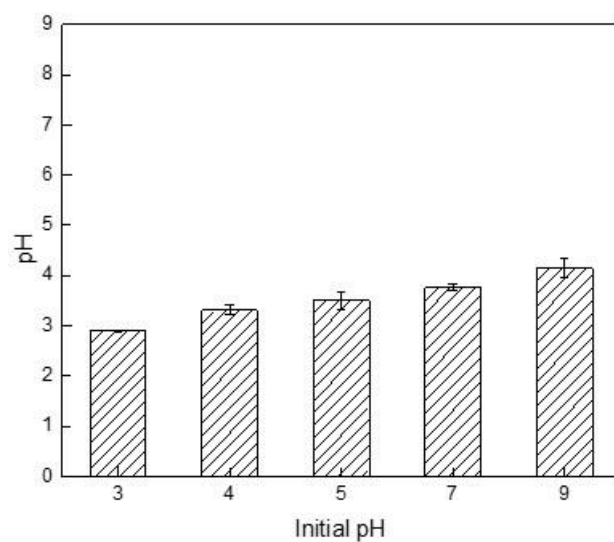

**Figure S1.** Final solution pH of the experiment regarding the effect of initial pH of 3, 4, 5, 7, and 9 in Pd(II)/PMS system. Condition: [phenol] = 50  $\mu$ M, [PMS] = 0.25 mM, [Pd(II)] = 10  $\mu$ M,  $pH_i$  = 3, 4, 5, 7, and 9.

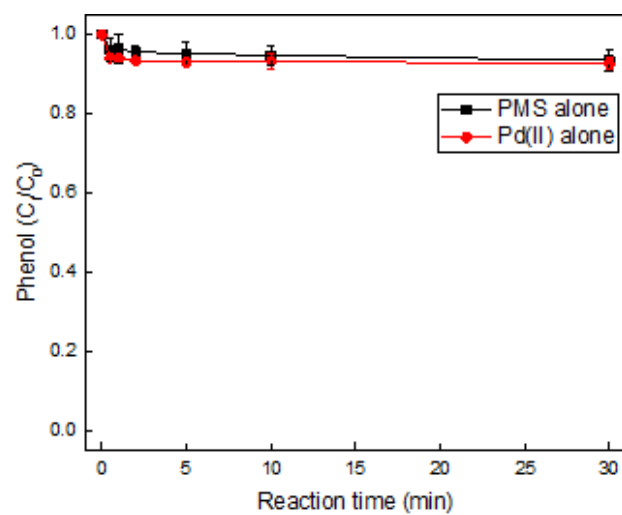

**Figure S2.** Degradation of phenol by PMS or Pd(II) alone. Condition: [phenol] = 50  $\mu$ M, [PMS] = 0.25 mM, [Pd(II)] = 10  $\mu$ M,  $pH_i$  = 4.

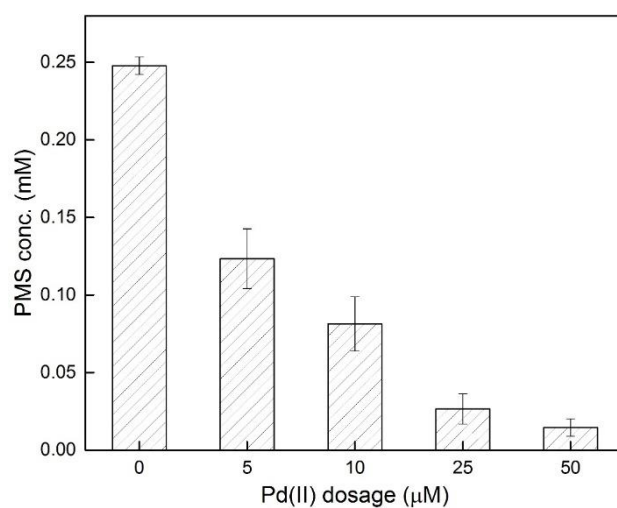

**Figure S3.** Decomposition of PMS by various Pd(II) dosage after 30 min. Condition: [phenol] = 50  $\mu\text{M}$ , [PMS] = 0.25 mM, [Pd(II)] = 0, 5, 10, 25, and 50  $\mu\text{M}$ ,  $\text{pH}_i = 4$ .

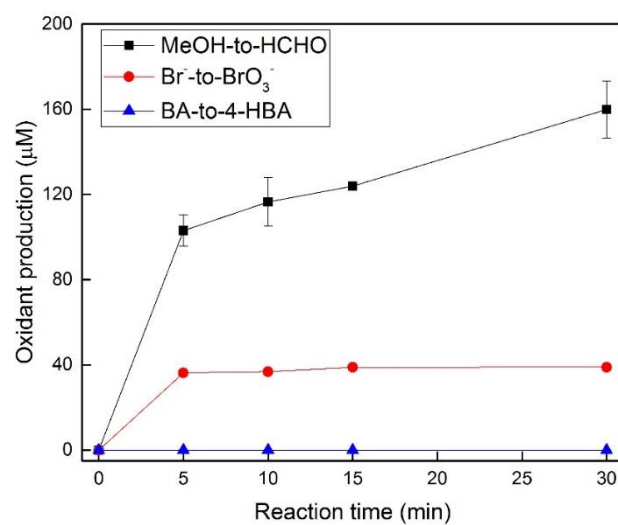

**Figure S4.** Oxidant production of HCHO, bromate, and 4-HBA in Co(II)/PMS system. Condition: [MeOH] = 200 mM, [Br<sup>-</sup>] = 0.1 mM, [BA] = 10 mM, [PMS] = 0.25 mM, [Co(II)] = 25 μM, pH<sub>i</sub> = 4.

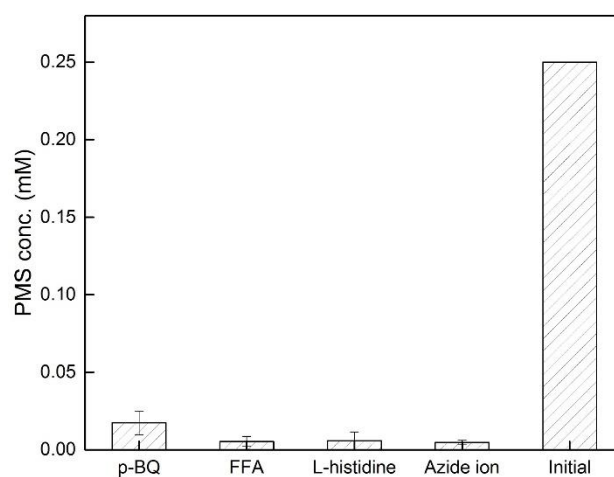

**Figure S5.** Comparison of PMS concentration between with and without the presence of  $^1\text{O}_2$  scavengers at the reaction time of 5 min. Condition:  $[\text{phenol}] = 50 \mu\text{M}$ ,  $[\text{PMS}] = 0.25 \text{ mM}$ ,  $[\text{Pd(II)}] = 25 \mu\text{M}$ ,  $[\text{FFA}] = [\text{L-histidine}] = [\text{N}_3^-] = 200 \text{ mM}$ ,  $[\text{p-BQ}] = 100 \text{ mM}$ ,  $\text{pH}_i = 4$ .

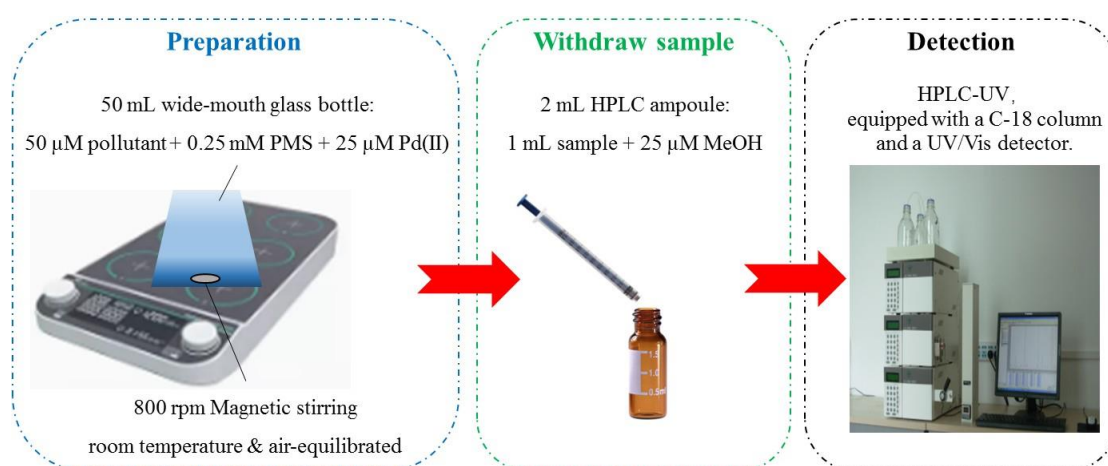

**Scheme S1.** Typically experimental process in this work from sample preparation to detection by HPLC-UV.

**Table S1** Information of chemicals and materials.

| Chemical                                                    | Abbreviation                      | CAS         |
|-------------------------------------------------------------|-----------------------------------|-------------|
| carbamazepine                                               | CBZ                               | 298-46-4    |
| caffeine                                                    | Caffeine                          | 58-08-2     |
| bisphenol A                                                 | BPA                               | 80-05-7     |
| acid orange 74                                              | AO74                              | 10127-27-2  |
| rhodamine B                                                 | RB                                | 81-88-9     |
| 1,4-dioxane                                                 | 1,4-D                             | 123-91-1    |
| 4-chlorophenol                                              | 4-CP                              | 106-48-9    |
| 4-hydroxyphenylacetic acid                                  | 4-HBA                             | 156-38-7    |
| 4-nitrobenzoic acid                                         | 4-NBA                             | 62-23-7     |
| 4-nitroaniline                                              | 4-NA                              | 100-01-6    |
| 4-nitrophenol                                               | NP                                | 100-02-7    |
| benzoic acid                                                | BA                                | 65-85-0     |
| nitrobenzene                                                | NB                                | 98-95-3     |
| phenol                                                      | Phenol                            | 108-95-2    |
| 2,4-dichlorophenol                                          | DCP                               | 120-83-2    |
| 2,4,6-trichlorophenol                                       | TCP                               | 88-06-2     |
| p-benzoquinone                                              | p-BQ                              | 106-51-4    |
| sodium azide                                                | NaN <sub>3</sub>                  | 26628-22-8  |
| L-histidine                                                 | L-histidine                       | 71-00-1     |
| Oxone                                                       | PMS                               | 10058-23-8  |
| palladium(II) chloride                                      | Na <sub>2</sub> PdCl <sub>4</sub> | 7647-10-1   |
| cobalt(II) chloride                                         | CoCl <sub>2</sub>                 | 7646-79-9   |
| sodium hydroxide                                            | NaOH                              | 8012-01-9   |
| perchloric acid                                             | HClO <sub>4</sub>                 | 7601-90-3   |
| sodium bromide                                              | NaBr                              | 7647-15-6   |
| sodium bromate                                              | NaBrO <sub>3</sub>                | 7789-38-0   |
| potassium iodide                                            | KI                                | 7681-11-0   |
| phosphoric acid                                             | H <sub>3</sub> PO <sub>4</sub>    | 7664-38-2   |
| 5-tert-butoxycarbonyl-5-methyl-1-pyrroline- <i>N</i> -oxide | BMPO                              | 387334-31-8 |
| Deuterium oxide                                             | D <sub>2</sub> O                  | 7789-20-0   |
| 2,4-dinitrophenylhydrazine                                  | DNPH                              | 119-26-6    |
| methanol                                                    | MeOH                              | 67-56-1     |
| <i>tert</i> -butyl alcohol                                  | TBA                               | 75-65-0     |
| furfuryl alcohol                                            | FFA                               | 98-00-0     |
| acetonitrile                                                | ACN                               | 75-05-8     |
| formaldehyde                                                | HCHO                              | 50-00-0     |

Ultrapure water (> 18 MΩ•cm) produced by a Milli-Q Water Purification System (Millipore) was used for the preparation of all experimental solutions and suspensions.



**Table S2** Operating conditions for high-performance liquid chromatographic analysis.

| Compound | Tube A<br>(%) | Tube B<br>(%) | Tube C<br>(%) | Wavelength<br>(nm) | Flowrate<br>(mL min <sup>-1</sup> ) |
|----------|---------------|---------------|---------------|--------------------|-------------------------------------|
| phenol   | 50            | 50            | 0             | 277                | 0.8                                 |
| CBZ      | 60            | 30            | 10            | 215                | 1.0                                 |
| Caffeine | 60            | 0             | 40            | 264                | 0.8                                 |
| BPA      | 55            | 45            | 0             | 230                | 0.8                                 |
| RB       | 25            | 30            | 45            | 546                | 0.5                                 |
| AO74     | 50            | 25            | 25            | 476                | 0.6                                 |
| 1,4-D    | 95            | 5             | 0             | 190                | 1.0                                 |
| BA       | 50            | 50            | 0             | 227                | 0.8                                 |
| 4-HBA    | 80            | 20            | 0             | 270                | 0.8                                 |
| NB       | 40            | 0             | 60            | 275                | 0.8                                 |
| NP       | 60            | 20            | 20            | 317                | 0.8                                 |
| 4-NBA    | 50            | 50            | 0             | 270                | 0.5                                 |
| 4-NA     | 60            | 0             | 40            | 254                | 1.0                                 |
| 4-CP     | 60            | 40            | 0             | 230                | 0.8                                 |
| DCP      | 30            | 70            | 0             | 280                | 1.0                                 |
| TCP      | 30            | 0             | 70            | 290                | 1.0                                 |
| HCHO     | 50            | 50            | 0             | 350                | 1.0                                 |

Tube A, B, and C stood for 0.1% H<sub>3</sub>PO<sub>4</sub>, ACN, and MeOH, respectively.

**Table S3** The interpretation on 17 molecular characters.

| Characters          | Interpretation                                                                           |
|---------------------|------------------------------------------------------------------------------------------|
| $\mu$               | Dipole moment                                                                            |
| $E_{B3LYP}$         | The total energy of a molecule                                                           |
| $E_{HOMO}$          | Energy of the highest occupied molecular orbital                                         |
| $E_{LUMO}$          | Energy of the lowest unoccupied molecular orbital                                        |
| $q(H)_x$            | Most positive partial charge on a hydrogen atom                                          |
| $q(C)_n/q(C)_x$     | Minimum and maximum negative partial charge on a carbon atom                             |
| $q(C-H)_n/q(C-H)_x$ | Minimum and maximum positive partial charge on a hydrogen atom linked with a carbon atom |
| $BO_n/BO_x$         | Minimum and maximum number of chemical bonds between a pair of coterminous atoms         |
| $F(0)_n/F(0)_x$     | Minimum and maximum value of Fukui indices by hydroxyl radical attack                    |
| $F(+)_n/F(+)_x$     | Minimum and maximum value of Fukui indices by nucleophilic attack                        |
| $F(-)_n/F(-)_x$     | Minimum and maximum value of Fukui indices by electrophilic attack                       |

1 **Table S4** Relationship between degradation rate ( $k$ ) and 17 molecular descriptors of 16 target pollutants in Pd(II)/PMS system.

| Compound                       | $k$<br>(min <sup>-1</sup> ) | $\mu$<br>(Debye) | $E_{\text{B3LYP}}$<br>(eV) | $E_{\text{HOMO}}$<br>(eV) | $E_{\text{LUMO}}$<br>(eV) | $q(\text{H})_{\text{x}}$<br>(e) | $q(\text{C})_{\text{n}}$<br>(e) | $q(\text{C})_{\text{x}}$<br>(e) | $q(\text{C-H})_{\text{n}}$<br>(e) | $q(\text{C-H})_{\text{x}}$<br>(e) | $\text{BO}_{\text{n}}$ | $\text{BO}_{\text{x}}$ | $\text{F}(-)_{\text{n}}$<br>(e) | $\text{F}(-)_{\text{x}}$<br>(e) | $\text{F}(+)_{\text{n}}$<br>(e) | $\text{F}(+)_{\text{x}}$<br>(e) | $\text{F}(0)_{\text{n}}$<br>(e) | $\text{F}(0)_{\text{x}}$<br>(e) |
|--------------------------------|-----------------------------|------------------|----------------------------|---------------------------|---------------------------|---------------------------------|---------------------------------|---------------------------------|-----------------------------------|-----------------------------------|------------------------|------------------------|---------------------------------|---------------------------------|---------------------------------|---------------------------------|---------------------------------|---------------------------------|
| phenol                         | 0.589                       | 1.583            | -307                       | -0.164                    | 0.009                     | 0.460                           | -0.254                          | 0.347                           | 0.185                             | 0.208                             | 0.879                  | 1.387                  | 0.040                           | 0.111                           | 0.032                           | 0.102                           | 0.055                           | 0.095                           |
| Caffeine                       | 0.057                       | 4.694            | -681                       | -5.834                    | -0.988                    | 0.404                           | -0.365                          | 0.837                           | 0.164                             | 0.243                             | 0.885                  | 1.812                  | 0.012                           | 0.106                           | 0.015                           | 0.125                           | 0.016                           | 0.106                           |
| CBZ                            | 0.232                       | 3.555            | -763                       | -6.041                    | -1.614                    | 0.389                           | -0.200                          | 0.838                           | 0.200                             | 0.218                             | 0.920                  | 1.813                  | 0.007                           | 0.079                           | -0.002                          | 0.089                           | 0.006                           | 0.077                           |
| BPA                            | 0.314                       | 1.583            | -653                       | -0.043                    | 0.011                     | 0.465                           | -0.312                          | 0.330                           | 0.158                             | 0.212                             | 0.878                  | 1.373                  | -0.026                          | 0.077                           | -0.016                          | 0.061                           | -0.019                          | 0.056                           |
| RB                             | 0.424                       | 9.205            | -1881                      | -0.229                    | -0.012                    | 0.382                           | -0.581                          | 0.438                           | 0.190                             | 0.280                             | 0.962                  | 1.530                  | -0.007                          | 0.038                           | -0.005                          | 0.063                           | -0.006                          | 0.062                           |
| AO74                           | 0.363                       | 13.83            | -1597                      | -0.279                    | -0.016                    | 0.484                           | -0.296                          | 0.477                           | 0.166                             | 0.226                             | 1.045                  | 1.679                  | -0.012                          | 0.033                           | 0.014                           | 0.034                           | 0.012                           | 0.033                           |
| 1,4-D                          | 0.513                       | 0                | -307                       | -6.607                    | 1.333                     | 0.183                           | -0.050                          | -0.050                          | 0.155                             | 0.183                             | 0.874                  | 0.978                  | 0.052                           | 0.174                           | 0.057                           | 0.100                           | 0.057                           | 0.118                           |
| BA                             | 0.059                       | 1.243            | -217                       | -0.088                    | 0.385                     | 0.206                           | -0.588                          | 0.039                           | 0.189                             | 0.206                             | 0.964                  | 1.381                  | 0.044                           | 0.101                           | -0.023                          | 0.096                           | -0.022                          | 0.096                           |
| 4-HBA                          | 0.141                       | 1.868            | -496                       | -6.656                    | -1.284                    | 0.479                           | -0.291                          | 0.362                           | 0.202                             | 0.225                             | 0.933                  | 1.864                  | 0.031                           | 0.132                           | 0.033                           | 0.131                           | 0.036                           | 0.109                           |
| NB                             | 0.052                       | 5.145            | -437                       | -0.276                    | -0.140                    | 0.338                           | -0.291                          | 0.061                           | 0.208                             | 0.238                             | 1.323                  | 1.590                  | -0.022                          | 0.060                           | 0.035                           | 0.094                           | 0.016                           | 0.077                           |
| NP                             | 0.084                       | 5.304            | -512                       | -0.262                    | -0.089                    | 0.468                           | -0.282                          | 0.366                           | 0.207                             | 0.239                             | 1.296                  | 1.836                  | 0.007                           | 0.087                           | 0.045                           | 0.116                           | 0.066                           | 0.096                           |
| 4-NBA                          | 0.065                       | 3.672            | -930                       | -0.320                    | -0.128                    | 0.489                           | -0.157                          | 0.815                           | 0.262                             | 0.276                             | 0.909                  | 1.913                  | 0.010                           | 0.224                           | 0.019                           | 0.121                           | 0.002                           | 0.141                           |
| 4-NA                           | 0.125                       | 7.846            | -1203                      | -0.224                    | -0.119                    | 0.469                           | -0.234                          | 0.762                           | 0.210                             | 0.255                             | 0.778                  | 1.642                  | -0.015                          | 0.233                           | -0.006                          | 0.143                           | -0.003                          | 0.135                           |
| 4-CP                           | 0.786                       | 2.544            | -767                       | -6.337                    | -0.751                    | 0.463                           | -0.273                          | 0.335                           | 0.203                             | 0.219                             | 0.955                  | 1.389                  | 0.039                           | 0.220                           | 0.029                           | 0.123                           | 0.037                           | 0.166                           |
| DCP                            | 1.220                       | 3.148            | -1226                      | -6.563                    | -1.067                    | 0.468                           | -0.255                          | 0.307                           | 0.207                             | 0.235                             | 0.951                  | 1.381                  | 0.032                           | 0.196                           | 0.027                           | 0.142                           | 0.035                           | 0.151                           |
| TCP                            | 1.675                       | 1.384            | -1686                      | -6.814                    | -1.369                    | 0.480                           | -0.248                          | 0.278                           | 0.238                             | 0.238                             | 0.919                  | 1.333                  | 0.032                           | 0.191                           | 0.022                           | 0.138                           | 0.030                           | 0.145                           |
| <b>Correlation coefficient</b> | <b>-0.242</b>               | <b>-0.467</b>    | <b>-0.509</b>              | <b>-0.318</b>             | <b>-0.318</b>             | <b>0.228</b>                    | <b>0.180</b>                    | <b>-0.265</b>                   | <b>-0.203</b>                     | <b>-0.101</b>                     | <b>-0.209</b>          | <b>-0.543</b>          | <b>0.408</b>                    | <b>0.377</b>                    | <b>0.210</b>                    | <b>0.275</b>                    | <b>0.315</b>                    | <b>0.447</b>                    |

2
